# Supplementary material for: Disinfection effect of povidone-iodine in aquaculture water of swamp eel (Monopterus albus)
Source: PeerJ. 2018 Nov 29;6:e5523. doi: 10.7717/peerj.5523 (PMC6275116; doi:10.7717/peerj.5523)
Supplement: Supplemental Information 1 [file peerj-06-5523-s001.xlsx]

## Sheet: Disinfection Effect
Outdoor Aquaculture Water								Indoor Aquaculture Water								LB							ddH20
100 ppm PVP-I								20 ppm PVP-I								4000 ppm PVP-I							5 ppm PVP-I
		0 h	2 h	4 h	8 h	12 h				0 h	2 h	4 h	8 h	12 h			0 h	2 h	4 h	8 h	12 h			0 h	2 h	4 h	8 h	12 h
Sample 1	Number of Colonies	31	1	0	0	0		Isolate 1	Number of Colonies	186	0	0	0	0		Number of Colonies	361	1	0	0	0		Number of Colonies	114	0	0	0	0
		37	3	0	0	0				219	0	0	0	0			327	0	0	0	0			123	0	0	0	0
		36	2	0	0	0				226	0	0	0	0			349	0	0	0	0			129	0	0	0	0
	Dilution Factor	20	20	20	20	20			Dilution Factor	1000	20	20	20	20		Dilution Factor	2000	20	20	20	20		Dilution Factor	2000	20	20	20	20
Sample 2	Number of Colonies	66	2	1	1	0		Isolate 2	Number of Colonies	204	0	0	0	0		Number of Colonies	245	0	0	0	0
		87	0	0	0	0				192	0	0	0	0			223	0	0	0	0		2.5 ppm PVP-I
		85	2	0	0	0				184	0	0	0	0			217	0	0	0	0			0 h	2 h	4 h	8 h	12 h
	Dilution Factor	20	20	20	20	20			Dilution Factor	1000	20	20	20	20		Dilution Factor	200	20	20	20	20		Number of Colonies	73	1	0	0	0
Sample 3	Number of Colonies	20	1	1	1	1		Isolate 3	Number of Colonies	517	0	0	0	0										85	1	0	0	0
		17	2	0	0	1				499	0	0	0	0		2000 ppm PVP-I								102	0	0	0	0
		20	1	0	0	0				508	0	0	0	0			0 h	2 h	4 h	8 h	12 h		Dilution Factor	2000	20	20	20	20
	Dilution Factor	20	20	20	20	20			Dilution Factor	1000	20	20	20	20		Number of Colonies	361	115	44	101	403		Number of Colonies	73	0	0	0	0
Sample 4	Number of Colonies	188	1	1	1	0		Isolate 4	Number of Colonies	428	0	0	0	0			327	145	36	124	352			85	0	0	0	0
		210	2	0	0	0				375	0	0	0	0			349	118	39	131	384			102	1	0	0	0
		196	0	0	0	0				401	0	0	0	0		Dilution Factor	2000	2000	2000	2000	2000		Dilution Factor	200	20	20	20	20
	Dilution Factor	20	20	20	20	20			Dilution Factor	1000	20	20	20	20		Number of Colonies	477	266	252	139	335
								Isolate 5	Number of Colonies	615	0	0	0	0			505	266	189	150	366		1.25 ppm PVP-I
80 ppm PVP-I										566	0	0	0	0			538	234	231	141	361			0 h	2 h	4 h	8 h	12 h
		0 h	2 h	4 h	8 h	12 h				589	0	0	0	0		Dilution Factor	20	20	20	20	20		Number of Colonies	73	7	1	0	0
Sample 1	Number of Colonies	31	3	1	0	0			Dilution Factor	1000	20	20	20	20		Number of Colonies	239	143	59	77	1			85	5	0	0	0
		37	2	0	0	0		Isolate 6	Number of Colonies	559	0	0	0	0			285	145	62	57	0			102	4	1	0	0
		36	0	0	0	0				581	0	0	0	0			251	138	58	68	1		Dilution Factor	2000	20	20	20	20
	Dilution Factor	20	20	20	20	20				573	0	0	0	0		Dilution Factor	20	20	20	20	20		Number of Colonies	73	1	0	0	0
Sample 2	Number of Colonies	66	1	1	1	1			Dilution Factor	1000	20	20	20	20										85	1	0	0	0
		87	1	0	0	0										1000 ppm PVP-I								102	0	0	0	0
		85	0	0	0	0		10 ppm PVP-I									0 h	2 h	4 h	8 h	12 h		Dilution Factor	200	20	20	20	20
	Dilution Factor	20	20	20	20	20				0 h	2 h	4 h	8 h	12 h		Number of Colonies	361	263	236	145	202		Number of Colonies	115	0	0	0	0
Sample 3	Number of Colonies	20	2	1	1	0		Isolate 1	Number of Colonies	186	0	0	0	0			327	248	342	186	194			147	0	0	0	0
		17	0	1	0	1				219	0	0	0	0			349	231	304	175	208			138	0	0	0	0
		20	1	0	0	0				226	0	0	0	0		Dilution Factor	2000	2000	2000	2000000	20000000		Dilution Factor	20	20	20	20	20
	Dilution Factor	20	20	20	20	20			Dilution Factor	1000	20	20	20	20		Number of Colonies	477	335	302	86	93
Sample 4	Number of Colonies	188	1	1	1	0		Isolate 2	Number of Colonies	204	0	0	0	0			505	354	283	78	115
		210	2	0	0	0				192	0	0	0	0			538	340	298	84	87
		196	0	0	0	0				184	0	0	0	0		Dilution Factor	20	20	20	2000	200000
	Dilution Factor	20	20	20	20	20			Dilution Factor	1000	20	20	20	20		Number of Colonies	239	240	125	95	87
								Isolate 3	Number of Colonies	517	224	103	47	205			285	220	197	76	105
50 ppm PVP-I						0				499	232	115	43	204			251	205	166	70	94
		0 h	2 h	4 h	8 h	12 h				508	218	109	45	198		Dilution Factor	20	20	20	200	20000
Sample 1	Number of Colonies	31	4	1	1	2			Dilution Factor	1000	20	20	20	20
		37	4	3	1	0		Isolate 4	Number of Colonies	428	74	45	8	12		500 ppm PVP-I
		36	2	1	0	0				375	76	45	12	9			0 h	2 h	4 h	8 h	12 h
	Dilution Factor	20	20	20	20	20				401	75	48	8	15		Number of Colonies	361	369	90	200	62
Sample 2	Number of Colonies	66	1	1	1	1			Dilution Factor	1000	20	20	20	20			327	341	168	213	77
		87	1	1	1	1		Isolate 5	Number of Colonies	615	10	1	3	3			349	333	121	225	68
		85	1	0	0	0				566	5	5	1	3		Dilution Factor	2000	2000	20000	2000000	200000000
	Dilution Factor	20	20	20	20	20				589	8	4	0	2		Number of Colonies	477	326	87	316	311
Sample 3	Number of Colonies	20	3	1	1	2			Dilution Factor	1000	20	20	20	20			505	309	80	368	315
		17	4	1	2	1		Isolate 6	Number of Colonies	559	25	15	2	4			538	317	101	252	293
		20	2	1	0	0				581	11	12	1	6		Dilution Factor	20	20	200	2000	200000
	Dilution Factor	20	20	20	20	20				573	17	14	0	5		Number of Colonies	239	239	278	334	433
Sample 4	Number of Colonies	188	4	1	1	1			Dilution Factor	1000	20	20	20	20			285	208	355	270	472
		210	4	2	1	2											251	222	314	314	485
		196	1	0	0	0		5 ppm PVP-I								Dilution Factor	20	20	20	2000	20000
	Dilution Factor	20	20	20	20	20				0 h	2 h	4 h	8 h	12 h
								Isolate 1	Number of Colonies	456	1	0	0	0
25 ppm PVP-I										436	1	0	0	0
		0 h	2 h	4 h	8 h	12 h				451	0	0	0	0
Sample 1	Number of Colonies	31	4	2	1	0			Dilution Factor	100	20	20	20	20
		37	6	3	1	1			Number of Colonies	456	1	0	0	0
		36	3	2	1	1				436	1	0	0	0
	Dilution Factor	20	20	20	20	20				451	0	0	0	0
Sample 2	Number of Colonies	66	6	1	0	2			Dilution Factor	100	20	20	20	20
		87	2	1	1	1			Number of Colonies	456	2	0	0	0
		85	2	2	2	0				436	0	0	0	0
	Dilution Factor	20	20	20	20	20				451	0	0	0	0
Sample 3	Number of Colonies	20	3	1	1	1			Dilution Factor	10	20	20	20	20
		17	3	3	1	1		Isolate 2	Number of Colonies	204	84	46	35	120
		20	1	0	1	0				192	105	44	28	102
	Dilution Factor	20	20	20	20	20				184	93	49	32	111
Sample 4	Number of Colonies	188	4	2	4	1			Dilution Factor	1000	200	200	200	200
		210	4	2	2	1			Number of Colonies	444	40	11	5	7
		196	3	0	2	0				428	37	12	6	5
	Dilution Factor	20	20	20	20	20				431	45	12	4	4
									Dilution Factor	100	20	20	20	20
10 ppm PVP-I									Number of Colonies	444	0	0	0	0
		0 h	2 h	4 h	8 h	12 h				428	0	0	0	0
Sample 1	Number of Colonies	31	12	6	2	45				431	0	0	0	0
		37	6	2	2	50			Dilution Factor	10	20	20	20	20
		36	4	1	7	58		Isolate 3	Number of Colonies	517	312	122	128	344
	Dilution Factor	20	20	20	20	20				499	333	121	110	329
Sample 2	Number of Colonies	66	12	8	14	67				508	307	127	139	359
		87	17	5	19	58			Dilution Factor	1000	200	200	200	200
		85	10	6	16	62			Number of Colonies	92	111	52	24	69
	Dilution Factor	20	20	20	20	20				101	116	63	18	48
Sample 3	Number of Colonies	20	10	2	7	16				95	123	58	28	52
		17	8	1	3	14			Dilution Factor	100	20	20	20	20
		20	5	0	2	15			Number of Colonies	92	2	0	0	0
	Dilution Factor	20	20	20	20	20				101	0	0	0	0
Sample 4	Number of Colonies	188	31	24	59	296				95	3	0	0	0
		210	36	26	67	235			Dilution Factor	10	20	20	20	20
		196	35	28	66	264		Isolate 4	Number of Colonies	428	301	190	113	225
	Dilution Factor	20	20	20	20	20				375	279	181	109	247
										401	289	225	97	238
5 ppm PVP-I									Dilution Factor	1000	200	200	200	200
		0 h	2 h	4 h	8 h	12 h			Number of Colonies	219	80	77	38	58
Sample 1	Number of Colonies	31	16	16	10	67				239	117	79	24	68
		37	23	10	7	66				186	98	84	25	55
		36	20	12	3	63			Dilution Factor	100	20	20	20	20
	Dilution Factor	20	20	20	20	20			Number of Colonies	219	0	0	0	0
Sample 2	Number of Colonies	66	31	24	63	103				239	0	0	0	0
		87	28	21	69	123				186	0	0	0	0
		85	25	20	96	115			Dilution Factor	10	20	20	20	20
	Dilution Factor	20	20	20	20	20		Isolate 5	Number of Colonies	615	234	276	93	219
Sample 3	Number of Colonies	20	10	13	23	40				566	278	252	121	199
		17	8	11	28	47				589	264	256	117	161
		20	8	8	21	49			Dilution Factor	1000	200	200	200	200
	Dilution Factor	20	20	20	20	20			Number of Colonies	104	52	3	2	3
Sample 4	Number of Colonies	188	114	150	266	542				86	58	2	1	6
		210	115	144	254	405				111	56	3	2	4
		196	108	169	249	464			Dilution Factor	100	20	20	20	20
	Dilution Factor	20	20	20	20	20			Number of Colonies	104	0	0	0	0
										86	0	0	0	0
										111	0	0	0	0
									Dilution Factor	10	20	20	20	20
								Isolate 6	Number of Colonies	559	148	64	49	80
										581	154	56	46	68
										573	170	63	44	74
									Dilution Factor	1000	200	200	200	200
									Number of Colonies	192	23	4	4	39
										185	16	2	6	39
										199	12	2	3	54
									Dilution Factor	100	20	20	20	20
									Number of Colonies	192	0	0	0	0
										185	0	0	0	0
										199	0	0	0	0
									Dilution Factor	10	20	20	20	20
								2.5 ppm PVP-I
								Isolate 1	Number of Colonies	456	59	337	159	48
										436	55	318	182	38
										451	65	239	188	43
									Dilution Factor	100	200	20	20	200
									Number of Colonies	456	46	25	11	44
										436	57	28	11	38
										451	53	30	10	41
									Dilution Factor	10	20	20	20	20
								Isolate 2	Number of Colonies	444	538	316	181	236
										428	542	322	163	243
										431	544	298	204	259
									Dilution Factor	100	20	20	20	20
									Number of Colonies	444	28	6	4	18
										428	38	8	6	18
										431	29	9	7	20
									Dilution Factor	10	20	20	20	20
								Isolate 3	Number of Colonies	92	141	99	48	100
										101	158	81	37	105
										95	142	77	36	121
									Dilution Factor	100	20	20	20	20
									Number of Colonies	92	13	5	2	12
										101	18	5	1	18
										95	17	4	2	10
									Dilution Factor	10	20	20	20	20
								Isolate 4	Number of Colonies	219	211	76	37	83
										239	235	82	32	79
										186	198	71	41	58
									Dilution Factor	100	20	20	20	20
									Number of Colonies	219	11	1	0	6
										239	13	3	1	8
										186	13	2	1	9
									Dilution Factor	10	20	20	20	20
								Isolate 5	Number of Colonies	104	128	91	42	107
										86	116	61	30	98
										111	136	76	28	74
									Dilution Factor	100	20	20	20	20
									Number of Colonies	104	11	2	1	5
										86	10	3	0	4
										111	7	5	0	1
									Dilution Factor	10	20	20	20	20
								Isolate 6	Number of Colonies	192	215	115	78	158
										185	207	158	93	180
										199	231	137	85	171
									Dilution Factor	100	20	20	20	20
									Number of Colonies	192	26	2	1	1
										185	22	0	0	2
										199	21	0	0	0
									Dilution Factor	10	20	20	20	20

## Sheet: OD
	100%LB	50%LB	20%LB	10%LB	1%LB	ddH20
Control group	0	-0.013	-0.021	-0.022	-0.024	-0.025
Experimental group	-0.006	-0.01	-0.017	1.874	3.01	3.01
	-0.005	-0.01	-0.016	1.876	3.01	3.01
	-0.002	-0.008	-0.014	1.886	3.01	3.01

## Sheet: LC50
Concentration of PVPI (ppm)	Number of total fish	Number of dead fish	Mortality
100	10	0	0
100	10	0	0
100	10	0	0
150	10	3	0.3
150	10	5	0.5
150	10	2	0.2
175	10	5	0.5
175	10	4	0.4
175	10	4	0.4
200	10	7	0.7
200	10	8	0.8
200	10	8	0.8
250	10	10	1
250	10	10	1
250	10	10	1
